# Supplementary material
Source: MDPI journal article supplement (https://www.mdpi.com/2306-5710/10/2/36)
Supplement: s1 [file s1]

# Supplementary Materials: Paired t-test statistics

## Supplementary Materials: Tables showing statistics for the paired t-tests

**Table S1:** The results from the paired t-test, showing the difference between nectars made from fresh strawberries (Day 0), and nectars of strawberries been stored for 24 hours (Day 1) and 48 hours (Day 2). The AF0 is the acceptance factor of nectars after first production and AF12 is the acceptance factor of nectars after 12 weeks of storage. The Anthocyanin content is the total monomeric anthocyanin content of nectars (expressed as mg/Kg pelargonidin-3-glucoside equivalents). t represents the t-test statistic, df is the degrees of freedom, and CI 95% is the 95% Confidence Interval.

|                            |       | t    | df  | Significance | Mean Difference | CI 95%        |
|----------------------------|-------|------|-----|--------------|-----------------|---------------|
| <b>AF0</b>                 | Day 1 | 12.5 | 119 | <0.001       | 0.104 ± 0.091   | 0.088 – 0.121 |
|                            | Day 2 | 13.6 | 119 | <0.001       | 0.221 ± 0.178   | 0.189 – 0.253 |
| <b>AF12</b>                | Day 1 | 9.6  | 119 | <0.001       | 0.073 ± 0.083   | 0.058 – 0.088 |
|                            | Day 2 | 13.5 | 119 | <0.001       | 0.136 ± 0.110   | 0.116 – 0.156 |
| <b>Anthocyanin Content</b> | Day 1 | 7.5  | 89  | <0.001       | 16.7 ± 21.0     | 12.3 – 21.1   |
|                            | Day 2 | 9.6  | 89  | <0.001       | 33.6 ± 33.2     | 26.7 – 40.5   |

**Table S2:** The results from the paired t-test, showing the difference between nectars made from fresh strawberries (Day 0), and those been stored for 24 hours (Day 1) and 48 hours (Day 2) for each ripeness stage. The AF0 is the acceptance factor of nectars after first production and AF12 is the acceptance factor of nectars after 12 weeks of storage. The Anthocyanin content is the total monomeric anthocyanin content of nectars (expressed as mg/kg pelargonidin-3-glucoside equivalents). t represents the t-test statistic, df is the degrees of freedom, and CI 95% is the 95% Confidence Interval.

| Ripeness Stage              |                                |       | t    | df | Significance | Mean Difference | CI 95%        |
|-----------------------------|--------------------------------|-------|------|----|--------------|-----------------|---------------|
| <b>Ripeness 1<br/>White</b> | <b>AF0</b>                     | Day 1 | 21.4 | 23 | <0.001       | 0.119 ± 0.027   | 0.107 – 0.130 |
|                             |                                | Day 2 | 29.8 | 23 | <0.001       | 0.468 ± 0.077   | 0.436 – 0.501 |
|                             | <b>AF12</b>                    | Day 1 | 10.2 | 23 | <0.001       | 0.032 ± 0.016   | 0.026 – 0.026 |
|                             |                                | Day 2 | 18.9 | 23 | <0.001       | 0.145 ± 0.037   | 0.129 – 0.161 |
|                             | <b>Anthocyanin<br/>Content</b> | Day 1 | 7.96 | 17 | <0.001       | 6.7 ± 2.5       | 5.5 – 8.0     |
|                             |                                | Day 2 | 36   | 17 | <0.001       | 32.4 ± 7.2      | 28.8 – 36.0   |
| <b>Ripeness 2</b>           | <b>AF0</b>                     | Day 1 | 12.2 | 23 | <0.001       | 0.246 ± 0.099   | 0.204 – 0.287 |

|                                       |                            |       |      |    |        |                   |                |
|---------------------------------------|----------------------------|-------|------|----|--------|-------------------|----------------|
| <b>White/Orange</b>                   |                            | Day 2 | 19.2 | 23 | <0.001 | $0.369 \pm 0.094$ | 0.330 – 0.409  |
|                                       |                            | Day 1 | 8.6  | 23 | <0.001 | $0.189 \pm 0.107$ | 0.144 – 0.234  |
|                                       | <b>AF12</b>                | Day 2 | 27.9 | 23 | <0.001 | $0.307 \pm 0.054$ | 0.284 – 0.330  |
|                                       |                            | Day 1 | 8.3  | 17 | <0.001 | $43.3 \pm 22.1$   | 32.3 – 54.3    |
|                                       | <b>Anthocyanin Content</b> | Day 2 | 18.2 | 17 | <0.001 | $79.3 \pm 18.5$   | 70.1 – 88.5    |
|                                       |                            | Day 1 | 9.1  | 23 | <0.001 | $0.069 \pm 0.037$ | 0.053 – 0.084  |
| <b>Ripeness 3 Orange</b>              | <b>AF0</b>                 | Day 2 | 14.6 | 23 | <0.001 | $0.126 \pm 0.043$ | 0.108 – 0.144  |
|                                       |                            | Day 1 | 12.5 | 23 | <0.001 | $0.086 \pm 0.034$ | 0.072 – 0.100  |
|                                       | <b>AF12</b>                | Day 2 | 17.5 | 23 | <0.001 | $0.159 \pm 0.045$ | 0.141 – 0.178  |
|                                       |                            | Day 1 | 18.9 | 17 | <0.001 | $31.1 \pm 7.0$    | 27.6 – 34.6    |
|                                       | <b>Anthocyanin Content</b> | Day 2 | 10.8 | 17 | <0.001 | $50.5 \pm 19.8$   | 40.7 – 60.4    |
|                                       |                            | Day 1 | 11.4 | 23 | <0.001 | $0.053 \pm 0.023$ | 0.043 – 0.062  |
| <b>Ripeness 4 Red (ripe)</b>          | <b>AF0</b>                 | Day 2 | 9.9  | 23 | <0.001 | $0.077 \pm 0.038$ | 0.061 – 0.094  |
|                                       |                            | Day 1 | 11.4 | 23 | <0.001 | $0.026 \pm 0.027$ | 0.014 – 0.037  |
|                                       | <b>AF12</b>                | Day 2 | 7.1  | 23 | <0.001 | $0.050 \pm 0.034$ | 0.035 – 0.064  |
|                                       |                            | Day 1 | 3.8  | 17 | <0.001 | $4.7 \pm 5.35$    | 2.1 – 7.4      |
|                                       | <b>Anthocyanin Content</b> | Day 2 | 15.2 | 17 | <0.001 | $9.2 \pm 11.9$    | 3.3 – 15.2     |
|                                       |                            | Day 1 | 6.8  | 23 | <0.001 | $0.036 \pm 0.026$ | 0.025 – 0.047  |
| <b>Ripeness 5 Dark Red (overripe)</b> | <b>AF0</b>                 | Day 2 | 8.7  | 23 | <0.001 | $0.063 \pm 0.035$ | 0.048 – 0.078  |
|                                       |                            | Day 1 | 3.6  | 23 | 0.002  | $0.031 \pm 0.043$ | 0.013 – 0.049  |
|                                       | <b>AF12</b>                | Day 2 | 1.9  | 23 | 0.066  | $0.020 \pm 0.051$ | -0.001 – 0.049 |
|                                       |                            | Day 1 | -1   | 17 | 0.345  | $-2.5 \pm 10.8$   | -7.8 – 2.9     |
|                                       | <b>Anthocyanin Content</b> | Day 2 | -1   | 17 | 0.317  | $-3.5 \pm 14.6$   | -10.8 – 3.7    |
|                                       |                            |       |      |    |        |                   |                |

**Table S3:** The results from the paired t-test, showing the difference between the total soluble acidity (in °Brix), the titratable acidity (in g/L) and the pH of purees made from fresh strawberries (Day 0), and those been stored for 24 hours (Day 1) and 48 hours (Day 2) for each ripeness stage. Also shown is the difference in firmness of the strawberries (in kg/cm<sup>2</sup>) at these time points. t represents the t-test statistic, df is the degrees of freedom, and CI 95% is the 95% Confidence Interval.

| Ripeness Stage          |                                |       | t     | df | Significance | Mean Difference | CI 95%        |
|-------------------------|--------------------------------|-------|-------|----|--------------|-----------------|---------------|
| Ripeness 1 White        | TSS (°Brix)                    | Day 1 | 0.6   | 5  | 0.584        | 0.08 ± 0.33     | -0.28 – 0.45  |
|                         |                                | Day 2 | 3.3   | 5  | 0.023        | 0.45 ± 0.32     | 0.09 – 0.81   |
|                         | TA (g/L)                       | Day 1 | 0.5   | 5  | 0.624        | 0.26 ± 1.1      | -0.22 – 0.75  |
|                         |                                | Day 2 | 1.7   | 5  | 0.141        | 1.95 ± 2.55     | -0.92 – 4.8   |
|                         | pH                             | Day 1 | 1.1   | 5  | 0.331        | 0.50 ± 1.1      | -0.69 – 1.69  |
|                         |                                | Day 2 | 1.0   | 5  | 0.367        | 0.43 ± 1.06     | -0.68 – 1.54  |
|                         | Firmness (kg/cm <sup>2</sup> ) | Day 1 | -0.5  | 4  | 0.627        | -0.21 ± 0.91    | -1.35 – 0.92  |
|                         |                                | Day 2 | -3.8  | 4  | 0.020        | -0.89 ± 0.53    | -1.55 – -0.24 |
| Ripeness 2 White/Orange | TSS (°Brix)                    | Day 1 | 0.5   | 5  | 0.634        | 0.12 ± 0.56     | -0.47 – 0.71  |
|                         |                                | Day 2 | 2.1   | 5  | 0.094        | 0.65 ± 0.77     | -0.16 – 1.46  |
|                         | TA (g/L)                       | Day 1 | -0.2  | 5  | 0.875        | -0.06 ± 0.83    | -0.93 – 0.81  |
|                         |                                | Day 2 | 1.8   | 5  | 0.124        | 0.68 ± 0.90     | -0.27 – 1.63  |
|                         | pH                             | Day 1 | 0.9   | 5  | 0.407        | 0.05 ± 0.14     | -0.10 – 0.21  |
|                         |                                | Day 2 | -0.04 | 5  | 0.973        | -0.003 ± 0.17   | -0.18 – 0.18  |
|                         | Firmness (kg/cm <sup>2</sup> ) | Day 1 | 0.1   | 4  | 0.911        | 0.01 ± 0.21     | -0.25 – 0.28  |
|                         |                                | Day 2 | -0.2  | 4  | 0.817        | -0.03 ± 0.29    | -0.40 – 0.33  |
| Ripeness 3 Orange       | TSS (°Brix)                    | Day 1 | 0.09  | 5  | 0.932        | 0.02 ± 0.45     | -0.46 – 0.49  |
|                         |                                | Day 2 | 0.7   | 5  | 0.534        | 0.17 ± 0.61     | -0.48 – 0.81  |
|                         | TA (g/L)                       | Day 1 | 2.7   | 5  | 0.044        | 0.18 ± 0.25     | 0.01 – 0.54   |
|                         |                                | Day 2 | 7.1   | 5  | 0.001        | 0.86 ± 0.30     | 0.55 – 1.2    |
|                         | pH                             | Day 1 | 2.2   | 5  | 0.081        | 0.14 ± 0.16     | -0.03 – 0.31  |

|                                   |                                   |       |      |   |       |               |              |
|-----------------------------------|-----------------------------------|-------|------|---|-------|---------------|--------------|
| Ripeness 4 Red (ripe)             | Firmness<br>(kg/cm <sup>2</sup> ) | Day 2 | 1.4  | 5 | 0.225 | 0.09 ± 0.16   | -0.08 – 0.25 |
|                                   |                                   | Day 1 | 6.1  | 4 | 0.004 | 0.10 ± 0.04   | 0.05 – 0.14  |
|                                   |                                   | Day 2 | 0.7  | 4 | 0.502 | 0.04 ± 0.12   | -0.11 – 0.19 |
|                                   |                                   | Day 1 | 1.1  | 5 | 0.328 | 0.13 ± 0.30   | -0.18 – 0.45 |
|                                   | TSS (°Brix)                       | Day 2 | 0.5  | 5 | 0.653 | 0.12 ± 0.60   | -0.51 – 0.74 |
|                                   |                                   | Day 1 | 2.3  | 5 | 0.069 | 0.35 ± 0.37   | -0.04 – 0.74 |
|                                   |                                   | Day 2 | 3.7  | 5 | 0.013 | 1.65 ± 1.08   | 0.52 – 2.79  |
|                                   |                                   | Day 1 | 0.01 | 5 | 0.989 | 0.0008 ± 0.14 | -0.15 – 0.15 |
|                                   | pH                                | Day 2 | -2.2 | 5 | 0.076 | -0.16 ± 0.17  | -0.34 – 0.02 |
|                                   |                                   | Day 1 | 1.3  | 4 | 0.277 | 0.04 ± 0.06   | -0.04 – 0.12 |
|                                   |                                   | Day 2 | 0.3  | 4 | 0.804 | 0.02 ± 0.14   | -0.16 – 0.19 |
|                                   |                                   | Day 1 | 0.7  | 5 | 0.523 | 0.13 ± 0.48   | -0.37 – 0.63 |
| Ripeness 5 Dark Red<br>(overripe) | TA (g/L)                          | Day 2 | 0.3  | 5 | 0.750 | 0.12 ± 0.85   | -0.77 – 1.01 |
|                                   |                                   | Day 1 | 1.7  | 5 | 0.156 | 1.00 ± 1.47   | -0.54 – 2.5  |
|                                   |                                   | Day 2 | 4.4  | 5 | 0.007 | 1.41 ± 0.78   | 0.59 – 2.23  |
|                                   |                                   | Day 1 | -0.8 | 5 | 0.486 | -0.06 ± 0.18  | -0.24 – 0.13 |
|                                   | pH                                | Day 2 | -1.8 | 5 | 0.124 | -0.17 ± 0.22  | -0.40 – 0.07 |
|                                   |                                   | 1 Day | 0.3  | 4 | 0.784 | 0.004 ± 0.03  | -0.04 – 0.05 |
|                                   |                                   | Day 2 |      |   |       |               |              |
|                                   |                                   |       |      |   |       |               |              |

**Table S4:** The average increase (as determined by a paired t-test) in AF0, AF12 and Total Monomeric Anthocyanin Content [mg/kg pg-3-glu eqv] for each cultivar at each ripeness stage, between non-stored samples (Day0) and after 1 and 2 days of post-harvest storage.

|                                                    |                     | Allegro              | Malling Centenary    | Sibilla 1            | Sibilla 2            | Magnum               | Salsa                |
|----------------------------------------------------|---------------------|----------------------|----------------------|----------------------|----------------------|----------------------|----------------------|
| Difference in<br>AF0 between<br>Day 0 and Day<br>1 | White (1)           | 0.111 ± 0.001 *** cC | 0.074 ± 0.002 *** cA | 0.130 ± 0.002 *** bD | 0.105 ± 0.001 *** cB | 0.159 ± 0.001 *** cE | 0.133 ± 0.001 *** dD |
|                                                    | White/Orange<br>(2) | 0.102 ± 0.007 *** cA | 0.236 ± 0.008 *** dC | 0.263 ± 0.004 *** cE | 0.195 ± 0.003 *** dB | 0.251 ± 0.003 *** dD | 0.426 ± 0.003 *** eF |
|                                                    | Orange (3)          | 0.069 ± 0.009 *** bC | 0.030 ± 0.005 ** aB  | 0.075 ± 0.010 *** aD | 0.033 ± 0.007 ** aA  | 0.138 ± 0.002 *** cF | 0.067 ± 0.003 *** cE |

|                                                        |                     |                      |                       |                       |                      |                      |                       |
|--------------------------------------------------------|---------------------|----------------------|-----------------------|-----------------------|----------------------|----------------------|-----------------------|
|                                                        | Red (4)             | 0.081 ± 0.005 *** bC | 0.048 ± 0.005 *** bB  | 0.080 ± 0.005 *** aC  | 0.053 ± 0.023 *** bB | 0.045 ± 0.003 *** aB | 0.043 ± 0.005 ** bA   |
|                                                        | Dark Red (5)        | 0.026 ± 0.002 *** aB | 0.023 ± 0.008 ** aB   | 0.072 ± 0.016 ** aC   | 0.025 ± 0.006 ** aB  | 0.064 ± 0.005 *** bB | 0.004 ± 0.006 ns aA   |
|                                                        | All Ripeness Grades | 0.078 ± 0.031 *** A  | 0.082 ± 0.081 *** A   | 0.124 ± 0.075 *** A   | 0.08 ± 0.066 *** A   | 0.132 ± 0.076 *** A  | 0.130 ± 0.159 ** A    |
| <b>Difference in AF0 between Day 0 and Day 2</b>       | White (1)           | 0.491 ± 0.001 *** eD | 0.399 ± 0.010 *** eB  | 0.381 ± 0.001 *** cA  | 0.412 ± 0.003 *** eC | 0.569 ± 0.002 *** dF | 0.556 ± 0.001 *** eE  |
|                                                        | White/Orange (2)    | 0.254 ± 0.009 *** dA | 0.299 ± 0.004 *** dB  | 0.467 ± 0.002 *** dD  | 0.316 ± 0.004 *** dB | 0.371 ± 0.025 *** cC | 0.509 ± 0.001 *** dE  |
|                                                        | Orange (3)          | 0.105 ± 0.008 *** cC | 0.091 ± 0.009 *** bB  | 0.131 ± 0.006 *** bD  | 0.073 ± 0.002 *** bA | 0.187 ± 0.003 *** bF | 0.171 ± 0.003 *** cE  |
|                                                        | Red (4)             | 0.071 ± 0.004 *** bB | 0.110 ± 0.009 *** cD  | 0.126 ± 0.007 *** abE | 0.089 ± 0.005 *** cC | 0.012 ± 0.007 * aA   | 0.058 ± 0.007 *** aB  |
|                                                        | Dark Red (5)        | 0.040 ± 0.007 ** aA  | 0.070 ± 0.007 *** aB  | 0.109 ± 0.016 *** aC  | 0.030 ± 0.010 ** aA  | 0.025 ± 0.003 *** aA | 0.104 ± 0.007 *** bC  |
|                                                        | All Ripeness Grades | 0.192 ± 0.171 *** A  | 0.194 ± 0.135 *** A   | 0.243 ± 0.155 *** A   | 0.184 ± 0.155 *** A  | 0.233 ± 0.218 *** A  | 0.280 ± 0.216 * A     |
| <b>Difference in AF12 between Day 0 and Day 1</b>      | White (1)           | 0.040 ± 0.001 *** cD | 0.005 ± 0.001 ** aA   | 0.029 ± 0.001 *** bC  | 0.045 ± 0.002 *** cE | 0.025 ± 0.001 *** aB | 0.051 ± 0.001 *** bF  |
|                                                        | White/Orange (2)    | 0.091 ± 0.001 *** eD | 0.115 ± 0.001 *** cA  | 0.273 ± 0.001 *** eB  | 0.179 ± 0.004 *** eC | 0.098 ± 0.001 *** dD | 0.377 ± 0.003 *** dE  |
|                                                        | Orange (3)          | 0.047 ± 0.002 *** dA | 0.058 ± 0.005 *** bB  | 0.128 ± 0.002 *** dF  | 0.056 ± 0.002 *** dC | 0.112 ± 0.001 *** eE | 0.114 ± 0.002 *** cD  |
|                                                        | Red (4)             | 0.033 ± 0.002 *** bC | 0.010 ± 0.002 ** aB   | -0.014 ± 0.003 ** aA  | 0.009 ± 0.006 ns bB  | 0.059 ± 0.002 *** cD | 0.056 ± 0.009 ** bD   |
|                                                        | Dark Red (5)        | -0.004 ± 0.004 ns aB | 0.050 ± 0.008 *** bE  | 0.109 ± 0.006 *** cF  | -0.019 ± 0.004 ** aA | 0.037 ± 0.002 *** bD | 0.013 ± 0.005 * aC    |
|                                                        | All Ripeness Grades | 0.041 ± 0.031 *** A  | 0.048 ± 0.041 *** A   | 0.105 ± 0.101 *** AB  | 0.054 ± 0.07 ** AB   | 0.066 ± 0.035 *** AB | 0.122 ± 0.135 *** B   |
| <b>Difference in AF12 between Day 0 and Day 2</b>      | White (1)           | 0.195 ± 0.001 *** dD | 0.125 ± 0.001 *** cC  | 0.125 ± 0.002 *** cB  | 0.109 ± 0.001 *** cC | 0.109 ± 0.001 *** bA | 0.197 ± 0.001 *** dD  |
|                                                        | White/Orange (2)    | 0.305 ± 0.001 *** eD | 0.249 ± 0.003 *** dA  | 0.273 ± 0.001 *** eB  | 0.294 ± 0.004 *** eC | 0.304 ± 0.001 *** eD | 0.416 ± 0.001 *** eE  |
|                                                        | Orange (3)          | 0.096 ± 0.004 *** cA | 0.118 ± 0.006 *** cB  | 0.215 ± 0.003 *** dF  | 0.144 ± 0.003 *** dC | 0.203 ± 0.002 *** dE | 0.180 ± 0.004 *** cD  |
|                                                        | Red (4)             | 0.016 ± 0.004 ** aA  | 0.039 ± 0.005 *** bBC | 0.047 ± 0.004 *** aC  | 0.033 ± 0.005 *** bB | 0.121 ± 0.003 *** cD | 0.041 ± 0.002 *** bBC |
|                                                        | Dark Red (5)        | 0.041 ± 0.008 ** bD  | -0.019 ± 0.005 ** aB  | 0.099 ± 0.007 *** bE  | -0.052 ± 0.009 ** aA | 0.005 ± 0.002 *** aD | 0.000 ± 0.005 ns aC   |
|                                                        | All Ripeness Grades | 0.131 ± 0.110 *** A  | 0.103 ± 0.093 *** A   | 0.150 ± 0.084 *** A   | 0.109 ± 0.119 *** A  | 0.157 ± 0.090 *** A  | 0.167 ± 0.150 *** A   |
| <b>Difference in Anthocyanin content between Day 0</b> | White (1)           | 2.9 ± 1.2 ns bA      | 6.5 ± 0.4 ** bBC      | 5.6 ± 0.6 ** bAB      | 6.9 ± 0.7 ** cBC     | 9.3 ± 1.1 ** bC      | 9.3 ± 2.2 * bC        |
|                                                        | White/Orange (2)    | 22.1 ± 2.5 ** dA     | 32.6 ± 0.4 *** cB     | 25.0 ± 0.8 *** dA     | 50.6 ± 0.9 *** eD    | 43.8 ± 2.2 *** dC    | 85.9 ± 0.9 *** eE     |
|                                                        | Orange (3)          | 26.2 ± 1.1 *** dAB   | 43.6 ± 3.7 ** dD      | 32.6 ± 1.0 *** eC     | 30.8 ± 0.8 *** dBC   | 31.3 ± 2.1 ** cBC    | 22.2 ± 0.8 *** dA     |

|                                                                  |                  |                   |                   |                    |                    |                    |                   |
|------------------------------------------------------------------|------------------|-------------------|-------------------|--------------------|--------------------|--------------------|-------------------|
| <b>and Day 1</b>                                                 | Red (4)          | 8.1 ± 1.5 * cB    | -0.6 ± 1.0 ns aA  | 1.6 ± 0.7 ns aA    | -1.0 ± 2.5 ns bA   | 10.6 ± 3.4 * bB    | 9.9 ± 2.6 * cB    |
|                                                                  | Dark Red (5)     | -7.9 ± 2.5 * aAB  | -5.50 ± 2.1 * aBC | 20.2 ± 0.7 *** cD  | -11.3 ± 0.6 *** aA | -3.0 ± 1.8 ns aC   | -7.5 ± 1.4 * aABC |
|                                                                  | All Ripeness     | 10.3 ± 13.0 ** A  | 15.3 ± 20 * A     | 17.0 ± 12.1 *** A  | 15.2 ± 23.3 * A    | 18.4 ± 17.5 ** A   | 24.0 ± 33.6 * A   |
|                                                                  | Grades           |                   |                   |                    |                    |                    |                   |
| <b>Difference in Anthocyanin content between Day 0 and Day 2</b> | White (1)        | 33.6 ± 1.7 *** bB | 27.5 ± 0.7 *** cA | 24.7 ± 0.6 *** bA  | 34.3 ± 0.9 *** bB  | 28.5 ± 1.8 ** cA   | 45.8 ± 2.8 ** dC  |
|                                                                  | White/Orange (2) | 60.0 ± 1.5 *** cA | 57.3 ± 0.3 *** cA | 70.5 ± 0.3 *** cB  | 90.9 ± 0.9 *** dC  | 106.1 ± 1.1 *** eD | 91.2 ± 4 .0*** eC |
|                                                                  | Orange (3)       | 35.7 ± 2.5 ** bAB | 51.7 ± 3.9 ** dC  | 89.6 ± 3.2 *** dD  | 53.9 ± 0.3 *** cC  | 40.2 ± 2.0 *** dB  | 32.1 ± 0.9 *** cA |
|                                                                  | Red (4)          | 5.0 ± 1.7 * aB    | 17.2 ± 3.5 * bC   | 22.4 ± 0.8 *** abC | -3.1 ± 4.4 ns aAB  | -6.1 ± 6.5 ns bA   | 20.0 ± 0.7 *** bC |
|                                                                  | Dark Red (5)     | 9.8 ± 2.4 * aC    | -18.2 ± 2.8 ** aA | 20.3 ± 1.0 *** aD  | -8.0 ± 1.6 * aB    | -8.4 ± 3.2 * aB    | -16.8 ± 4.2 * aA  |
|                                                                  | All Ripeness     | 28.8 ± 20.6 *** A | 27.1 ± 28.1 ** A  | 45.5 ± 29.9 *** A  | 33.6 ± 38.1 ** A   | 32 ± 43.2 * A      | 34.5 ± 36.5 ** A  |
|                                                                  | Grades           |                   |                   |                    |                    |                    |                   |

Different lower case letters (vertical) illustrate significant differences (Tukey's test  $p < 0.05$ ) between the different ripeness stages. Different upper case letters (horizontal) indicate significant differences (Tukey's test  $p < 0.05$ ) between the different cultivars. \*\*\* and \*\*, \* and ns indicates significance at  $p < 0.001$ ,  $p < 0.01$ ,  $p < 0.05$  and no significance respectively.
